# Supplementary material for: Stress, coping, and psychological resilience among physicians
Source: Springer Nature journal article supplement (doi:10.1186/s12913-018-3541-8), 2018-09-21
Supplement: MOESM1 [file 16143446]

## Additional File 1. Interview Schedule

| <b>Interview Questions</b>                                                                                                                                                 |
|----------------------------------------------------------------------------------------------------------------------------------------------------------------------------|
| General Demographic Data: Professional experience, grade, specialty                                                                                                        |
| What does resilience mean to you?                                                                                                                                          |
| Which are the major challenges of your profession to your mental and physical health and job satisfaction? How successful would you consider your personal coping?         |
| How can a physician remain healthy and satisfied? What strategies do you apply? Are these the most important resilience strategies in your professional life?              |
| Of those colleagues that you would deem to have the greatest levels of resilience, what strategies do they apply in order to deal with the stressors of professional life? |
| Of those colleagues that you would deem to have the lowest levels of resilience, what strategies do they fail to apply to deal with the stressors of professional life?    |
| If a medical student asked you what he/she could do to increase resilience: Which advice would you give? What mistakes you made yourself would you warn against?           |
| Is there anything else we should have asked?                                                                                                                               |
