# Supplementary material for: Stress, coping, and psychological resilience among physicians
Source: Springer Nature journal article supplement (doi:10.1186/s12913-018-3541-8), 2018-09-21
Supplement: MOESM2 [file 16143446]

**Additional File 2. Themes and subthemes identified, along with definitions and exemplar quotes.**

**Table A. The Nature of Resilience**

| <b>Subtheme</b>                     | <b>Definition</b>                                                                      | <b>Sample quote</b>                                                                                                                            |
|-------------------------------------|----------------------------------------------------------------------------------------|------------------------------------------------------------------------------------------------------------------------------------------------|
| Continuing in Spite of Difficulties | PR as the ability to persevere with work despite challenges faced within the workplace | “The ability to endure and persist during difficult times” SPR 18                                                                              |
| Maintaining Wellbeing and Happiness | PR as keeping a consistent level of happiness and wellbeing in the face of stressors   | “What strategies we develop over the years in order to get by in work and to keep general good mental health” SHO 2                            |
| Toughening                          | PR as hardening to withstand stressors in the workplace                                | “Resilience to me would imply a level of toughness” SHO 16                                                                                     |
| Maintaining Performance             | PR as continuing to perform at work despite challenges                                 | “Persistence in establishing goals and overcoming any obstacles in path to pursuit of goals” Consultant 1                                      |
| Recovering from Hardships           | PR as a process of recovery from a stressful event                                     | “Resilience is your ability to pick yourself up when you are faced with adverse circumstances...” GP 8                                         |
| Coping with Difficulties            | PR as using coping mechanisms to deal with adverse events                              | “The ability to be flexible and cope with a stressor with something that either be mentally or physically or spiritually challenging” Intern 1 |
| Adapting to Circumstances           | PR as a process of adjusting to workplace events to reduce stress                      | “To adapt to circumstances without it affecting yourself” SHO 12                                                                               |

|                                               |                                                                       |                                                                                                                                                                                                |
|-----------------------------------------------|-----------------------------------------------------------------------|------------------------------------------------------------------------------------------------------------------------------------------------------------------------------------------------|
| Thriving in Spite of Difficulties             | PR as performing well despite adverse circumstances                   | “Resilience means thriving in the face of adversity” SHO 13                                                                                                                                    |
| Resilience as a Trait                         | PR defined as something which is inherent, a steady personality trait | “Maybe if you think that it’s something that you can pick up. I don’t think you can, I think if they’re a person that take things to heart, it’s not something that you can give people” SHO 7 |
| Resilience Developing with Time or Experience | PR as something that can be learned or developed through experience   | “And then I think sometimes it’s just experience, 2 years in versus 10 years in you look at things very differently” SPR6                                                                      |

*Note:* GP=General Practitioner, SHO=Senior House Officer, SpR=Specialist Registrar

**Table B. Challenges of the Profession**

| Subtheme                                                 | Definition                                                                               | Sample quote                                                                                                                                                                                                    |
|----------------------------------------------------------|------------------------------------------------------------------------------------------|-----------------------------------------------------------------------------------------------------------------------------------------------------------------------------------------------------------------|
| Compromised Basic Needs                                  | Basic needs such as food, rest, comfort breaks compromised at work                       | “... you were expected to work non-stop, you were only allowed to take breaks when somebody else decided you were allowed to take breaks as if you were in a prisoner of war camp or something”<br>Consultant 8 |
| Lack of Control or Unpredictability of Job               | Having little personal control over the workday                                          | “A big thing would be the loss of control in your day, there’s no strict start time or end time...” Intern 4                                                                                                    |
| Long Hours and Shift Work                                | Working more than the average, and working unsociable shift hours                        | “The biggest challenge were the hours. I’m not someone who functions well without sleep...” SPR 1                                                                                                               |
| Social Cost                                              | Work threatening social and relationship aspects of life                                 | “I think moving as well, so you’re moving around every year for... your career until you get settled somewhere its incredibly difficult”<br>SPR 6                                                               |
| Managing the Expectations of Patients and their Families | Dealing with unrealistic hopes and expectations from patients as a stressor or challenge | “I suppose the patient expectations put on you to fix your problems and the expectation you put on your yourself that you should be able to fix people’s problems for them” SPR 19                              |
| Interpersonal Interactions with Colleagues               | Challenging relationships with the team in work threatening resilience                   | “Lack of teamwork between MDT people. Sometimes the lack of teamwork between nurses and doctors would be a barrier...” SHO 6                                                                                    |
| Complex or Emotionally Taxing                            | Upsetting or stressful cases taking                                                      | “I look after patients with a history of sexual assault so I hear some                                                                                                                                          |

|                                                       |                                                                                 |                                                                                                                                                                                                                                                    |
|-------------------------------------------------------|---------------------------------------------------------------------------------|----------------------------------------------------------------------------------------------------------------------------------------------------------------------------------------------------------------------------------------------------|
| Cases                                                 | a toll on physicians' resilience                                                | horrible stories which can get in on you so you have to have measures to deal with it" Consultant 3                                                                                                                                                |
| All-Consuming work                                    | Not being able to switch off from work/detach from emotionally draining aspects | "Those who have bigger hearts, those who are more emotionally involved with patient groups... if you are that way inclined I think you will suffer more and tend to burn out quicker" GP 7                                                         |
| Insufficient Organisational Resources                 | Lack of physical resources from an organisational level                         | "The inability to get service improvement or just the provision at a proper level. Resource-poor and not being communicated with". Consultant 3                                                                                                    |
| Maintaining Work-Life Balance                         | Work interfering with other aspects of life/taking time from the rest of life   | "I don't live within the practice area so I don't have too many patients calling to the door, but I do have some out-of practice stuff, which does take up a lot of time... through email it certainly has impacted on quality of home life" GP 11 |
| Maintaining or Developing Knowledge and Skills        | Difficulty keeping up with developments in the field                            | "Constantly having to learn new things and being unfamiliar with certain things can be quite taxing, it can be quite exasperating to feel that you have something else to learn, there's always something unfamiliar that will crop up." Intern 7  |
| Negative Work Culture                                 | Social and cultural atmosphere in health system is negative                     | "You do put up with a lot of verbal abuse. Not necessarily said but with bad intentions, but it is a hyper masculine environment." SPR 5                                                                                                           |
| Working Outside of your Level of Ability or Knowledge | Stress of being out of your depth in a work situation                           | "Situations where your Reg and your SHO is off and you're post-call and then you're in a situation where you have to do something where you're not really comfortable in doing but there's not much you can do                                     |

|                                            |                                                                                      |                                                                                                                                                                                                                                                  |
|--------------------------------------------|--------------------------------------------------------------------------------------|--------------------------------------------------------------------------------------------------------------------------------------------------------------------------------------------------------------------------------------------------|
| <p>Threat of Litigation and Complaints</p> | <p>Challenge of dealing with potential legal action and complaints from patients</p> | <p>to ask for help.” Intern 3<br/> “[the biggest challenge] For myself would be the threat of litigation which I dealt with during my intern year.” SPR 17</p>                                                                                   |
| <p>Dealing with Responsibility</p>         | <p>Stress of having responsibility for care of patients</p>                          | <p>“you’re responsible for everything that happens to patients as you’re co-ordinator and diagnostician for all of their health” GP 4</p>                                                                                                        |
| <p>Workload and Competing Demands</p>      | <p>Challenge of having multiple tasks to prioritise and a heavy workload</p>         | <p>“I guess I suppose work volume increase year on year without increasing resources, so an ever increasing workload is the biggest thing and I would say prioritising and managing that workload without becoming overwhelmed” Consultant 5</p> |

**Table C. Job related gratification**

| <b>Subtheme</b>             | <b>Definition</b>                                                    | <b>Sample quote</b>                                                                                                                                                                                                                                  |
|-----------------------------|----------------------------------------------------------------------|------------------------------------------------------------------------------------------------------------------------------------------------------------------------------------------------------------------------------------------------------|
| Doctor-Patient Relationship | Gaining gratification from interpersonal relationships with patients | “Generally having a degree of genuine care for your patients does help your job satisfaction as well as you’re not just doing it for a paycheck, you’re working for the genuine interest for your patient” Consultant 6                              |
| Medical Efficacy            | Feeling gratified from helping patients get better                   | “Providing the best care to your patients is best for yourself, at the end of the day, to feel like I have accomplished something.” SPR 5                                                                                                            |
| Helping Colleagues          | Gratification from helping colleagues deal with stressful situations | “It’s also talking with colleagues and saying “Oh, that must be tough”, they haven’t taken a thing off you, all they’ve done is acknowledge it, but by acknowledging it, they’ve almost made you feel like someone else feels my pain here...” GP 10 |
| Payment                     | Financial remuneration as a benefit of the job                       | “You can kind of put up with everything that’s thrown at you, the long hours and hard work better when you’re adequately remunerated” GP 7                                                                                                           |

**Table D. Resilience Strategies: Protective Practices**

| Subtheme                          |                                                                     | Sample quote                                                                                                                                                                                                                         |
|-----------------------------------|---------------------------------------------------------------------|--------------------------------------------------------------------------------------------------------------------------------------------------------------------------------------------------------------------------------------|
| Engage in Leisure Activities      | Use of activities outside of work to boost PR                       | “I usually try to have some sort of holiday planned, not too often, but I do try to have something planned and something to look forward to.” SHO 10                                                                                 |
| Support from Colleagues           | PR supported through seeking help from co-workers                   | “I think it’s good to hang out with people who are in the job, who you can kind of...vent about work with and they understand. It’s different when you talk to people who aren’t in the job because they don’t really get it.” SHO 7 |
| Support from Family and Friends   | PR maintained by seeking social support from people outside of work | “I would say maintaining good friendships outside work and an active social life” GP 14                                                                                                                                              |
| Know When to Ask for Help         | Asking for help when out of your depth protective of PR             | “Don’t be afraid to say what happened if you did something wrong. It’s better to talk about it because every intern has these experiences” Intern 3                                                                                  |
| Maintain Boundaries with Patients | Actively keeping a distance from patients personally to protect PR  | “You have to realise that you’re not your life, while at the same time treat it with importance you have to have a systematic approach to everything.” SHO 11                                                                        |
| Prioritisation and Delegation     | Planning and prioritising time is supportive of PR                  | “I think time management and prioritising is probably the most important ... I know there are things you can’t plan for as well but...it’s about being aware what’s coming up” GP 12                                                 |
| Standing up for Yourself          | Defending yourself against patients in stressful situations         | “I think the majority have very good boundaries, I think they’ll accept what they can accept when services are very limited they will say I cannot                                                                                   |

|                                          |                                                                                                                    |                                                                                                                                                                                                           |
|------------------------------------------|--------------------------------------------------------------------------------------------------------------------|-----------------------------------------------------------------------------------------------------------------------------------------------------------------------------------------------------------|
| Maintain a Professional Approach to Work | seen as protective<br>Behaving professionally at work seen as protective of PR                                     | provide that service..." Consultant 6<br>"Another thing as well I suppose is just building competency in your job, I know as I have gotten more senior I get less stressed out in the hospital."<br>SPR 1 |
| Professional Supports                    | Accessing official supports for physicians to protect PR                                                           | "But there is some role for coaching. I did a diploma in coaching and I feel there is a real role for students and other people to received coaching."<br>Consultant 6                                    |
| Prioritisation of Basic Needs at Work    | Making time in work to look after your own needs protects PR                                                       | "Eating regularly is a big thing. If things aren't important and I need to eat I'll just go eat." Int 4                                                                                                   |
| Cultivating a Good Work-Life Balance     | Making an effort to remove yourself from workplace mentally and physically when not on duty in order to protect PR | "Detaching it, detaching it from work so if it is your day off, you're off and not coming in for other things." GP 12                                                                                     |
| Individual 'Healthful Habits'            | Taking part in healthy activities such as mindfulness, healthy eating, exercise                                    | "So I'm a daily meditator with my husband, I would've done a Mindfulness Based Stress Reduction program. ...It's been really helpful and...I now sort of nourish mindfulness and wellness" Consultant 7   |



**Table E. Resilience Strategies: Attitudes**

| Subtheme                              | Definition                                                                            | Sample quote                                                                                                                                                                       |
|---------------------------------------|---------------------------------------------------------------------------------------|------------------------------------------------------------------------------------------------------------------------------------------------------------------------------------|
| Acceptance and Realism                | Supporting resilience by having a realistic attitude to work, and accepting negatives | “I think the people with the greatest levels of resilience are those with the most realistic outlook on what they’re dealing with...” SHO 11                                       |
| Self-Awareness and Reflexivity        | PR supported by knowing your own self and being able to reflect on this               | “Knowing yourself, knowing your competency or on an emotional level is important.” SPR 1                                                                                           |
| Maintaining Perspective               | PR supported by keeping perspective on situations                                     | “I suppose look at it in the greater picture and not take the burden on your shoulders” Consultant 1                                                                               |
| Appreciating the Good Things          | Supporting PR through acknowledging and appreciating good aspects of the job          | “So my advice would be to try and accept your circumstances and work with them and not to get frustrated by them and just make the best of the good things that are there.” Int 10 |
| Belief in Yourself and your Abilities | Self-efficacy and belief in skills boosting PR                                        | “It’s work, so you’ve learnt the skills, you know what to do so be,... don’t doubt yourself. Even if you have some doubt, don’t doubt yourself” SHO 15                             |
